# Supplementary material
Source: Springer Nature journal article supplement (https://www.springermedizin.de/resource/supplementary/13033_2014_193_MOESM6_ESM.pdf/9652028)
Supplement: MOESM6 [file 9652028]

**Lack of supply of  
psychotropic medications**

```
graph TD; A[Lack of supply of psychotropic medications] --> B[Lack of demand by doctors:]; B --> C[Lack of demand by patients:]; C --> A;
```

**Lack of demand by doctors:**

1. lack of training
2. inability to prescribe psychotropic medication
3. no request for inclusion of medications in EDL
4. psychotropic medications not ordered at district level

**Lack of demand by patients:**

1. aware of absence of services locally
2. travel long distances and incur large expenses to access mental healthcare
